# Supplementary material for: Remediation of Cr(VI)-Contaminated Soil by Biochar-Supported Nanoscale Zero-Valent Iron and the Consequences for Indigenous Microbial Communities
Source: Nanomaterials (Basel). 2022 Oct 10;12(19):3541. doi: 10.3390/nano12193541 (PMC9565499; doi:10.3390/nano12193541)
Supplement: Supplementary file 1 [file nanomaterials-12-03541-s001.zip › nanomaterials-1946639-supplementary-revised.pdf]

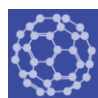

## Supplementary Materials

# Remediation of Cr(VI)-Contaminated Soil by Biochar-Supported Nanoscale Zero-Valent Iron and the Consequences for Indigenous Microbial Communities

Jianwei Yang <sup>1</sup>, Xiangpeng Tan <sup>1</sup>, Muhammad Shaaban <sup>2</sup>, Yajun Cai <sup>1</sup>, Buyun Wang <sup>1</sup> and Qi'an Peng <sup>1,\*</sup><sup>1</sup> School of Environmental Engineering, Wuhan Textile University, Wuhan 430073, China<sup>2</sup> Key Laboratory of Mountain Surface Processes and Ecological Regulation, Institute of Mountain Hazards and Environment, Chinese Academy of Sciences, Chengdu 610041, China

\* Correspondence: pqa2002\_@163.com

**Table S1.**  $\alpha$ -diversity index of bacterial communities in chromium-contaminated soils.

| Sample | Chao1                             | Observed species                  | Pielou's evenness            | Shannon                      | Simpson                      |
|--------|-----------------------------------|-----------------------------------|------------------------------|------------------------------|------------------------------|
| S      | 2673.08 $\pm$ 51.83 <sup>b</sup>  | 2612.55 $\pm$ 63.75 <sup>b</sup>  | 0.71 <sup>a</sup>            | 8.05 $\pm$ 0.08 <sup>a</sup> | 0.97 <sup>ab</sup>           |
| CK     | 1987.45 $\pm$ 174.38 <sup>c</sup> | 1736.10 $\pm$ 145.01 <sup>c</sup> | 0.58 $\pm$ 0.04 <sup>b</sup> | 6.24 $\pm$ 0.54 <sup>b</sup> | 0.93 $\pm$ 0.03 <sup>b</sup> |
| T7     | 3266.92 $\pm$ 8.37 <sup>a</sup>   | 3198.04 $\pm$ 3.24 <sup>a</sup>   | 0.72 $\pm$ 0.01 <sup>a</sup> | 8.35 $\pm$ 0.09 <sup>a</sup> | 0.98 <sup>a</sup>            |

Note: Different letters in the table indicate significant differences in the samples ( $p < 0.05$ ).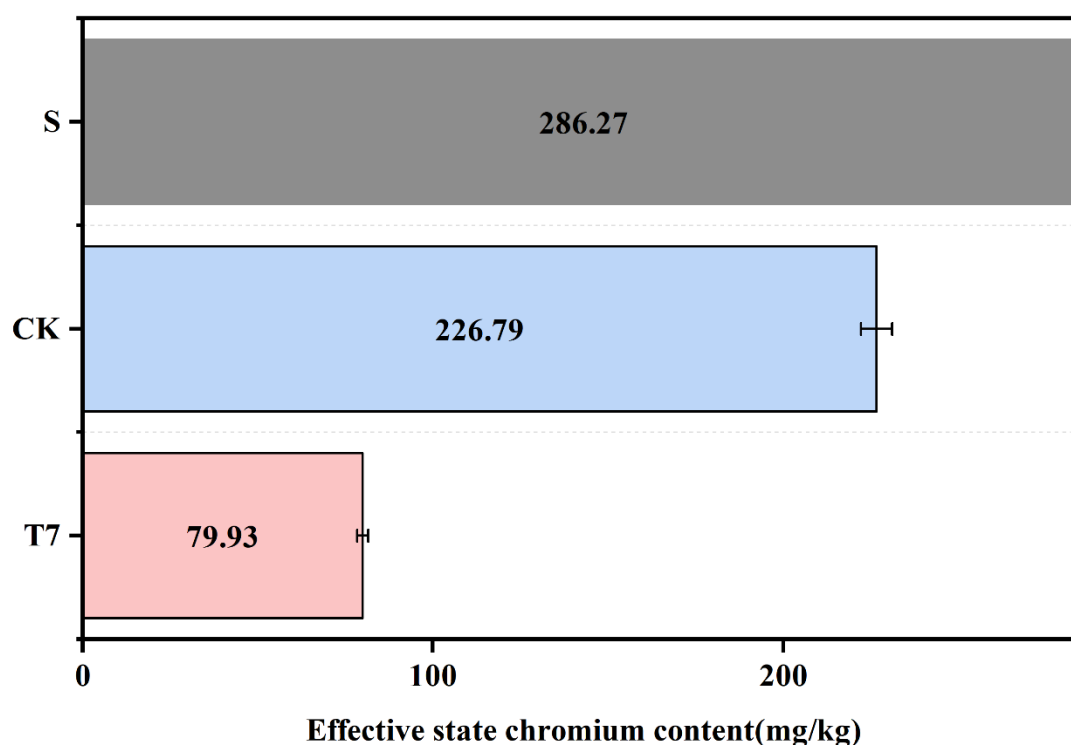**Figure S1.** Effect of RBC600-nZVI on the effective state of chromium in soil. (Unactivated original contaminated soil (S), Soil without any additive (CK), RBC600-nZVI 10 g/kg (T7)).

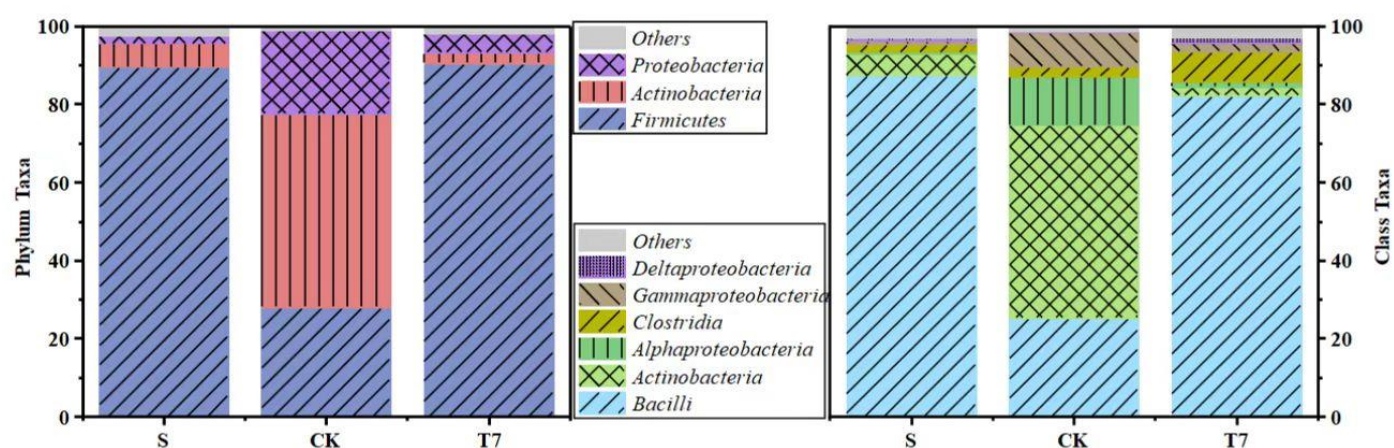

**Figure S2.** Relative abundance of bacterial communities in soil samples at the phylum (a) and phylum (b) levels. (Unactivated original contaminated soil (S), Soil without any additive (CK), RBC600-nZVI 10 g/kg (T7)).
